# Supplementary material
Source: PubMed Central journal article supplement (PMC7493416)
Supplement: sc9b00470_si_001.pdf [file sc9b00470_si_001.pdf]

## Supplementary information for

# Geminal Diol of Dihydrolevoglucosenone as a Switchable Hydrotrope: A Continuum of Green Nanostructured Solvents

Mario De bruyn,\* <sup>[a]</sup> <sup>[b]</sup> Vitaliy L. Budarin,<sup>[c]</sup> Antonio Misefari,<sup>[c]</sup> Seishi Shimizu,<sup>[d]</sup> Heather Fish,<sup>[d]</sup> Martin Cockett,<sup>[d]</sup> Andrew J. Hunt,<sup>[e]</sup> Heike Hofstetter,<sup>[f]</sup> Bert M. Weckhuysen,<sup>[b]</sup> James H. Clark,<sup>[c]</sup> Duncan J. Macquarrie, <sup>[c]</sup>.

- <sup>a.</sup> Department of chemical and biological engineering, University of Wisconsin-Madison, 1415 Engineering Drive, 53706 Wisconsin, USA
- <sup>b.</sup> Faculty of Science, Debye Institute for Nanomaterials Science, Utrecht University, Universiteitsweg 99, CG Utrecht 3584, The Netherlands
- <sup>c.</sup> Green Chemistry Centre of Excellence, Department of Chemistry, University of York, YO10 5DD, York, United Kingdom
- <sup>d.</sup> Department of Chemistry, University of York, YO10 5DD, York, United Kingdom
- <sup>e.</sup> Materials Chemistry Research Center, Department of Chemistry and Center of Excellence for Innovation in Chemistry, Faculty of Science, Khon Kaen University, Khon Kaen, 40002, Thailand
- <sup>f.</sup> Department of Chemistry, University of Wisconsin-Madison, 1101 University Ave, Madison, WI, 53706, USA

**29 pages**

### Contents

- **Figure 1S\_A:** <sup>13</sup>C NMR spectrum (with annotations) of the maximal dissolution of aspirin in a Cyrene/ Cyrene gem diol /H<sub>2</sub>O mixture made by adding Cyrene in 70 wt% to H<sub>2</sub>O.
- **Figure 1S\_B:** <sup>1</sup>H NMR spectrum (with annotations) of the maximal dissolution of aspirin in a Cyrene/ Cyrene gem diol /H<sub>2</sub>O mixture made by adding Cyrene in 70 wt% to H<sub>2</sub>O.
- **Table 1S\_A:** Solubilities of aspirin, salicylic acid, ferulic acid and phthalic acid as a function of the wt% of Cyrene in H<sub>2</sub>O. [293 K]
- **Table 1S\_B:** Experimental solubilities of mandelic acid and caffeine as a function of the wt% of Cyrene in H<sub>2</sub>O. [293 K]
- **Table 2S\_A:** Composition of the Cyrene/gem diol/water ternary mixture (mol geminal diol and mol H<sub>2</sub>O both normalized to 1 mol Cyrene). [298 K]
- **Table 2S\_B:** Concentration data of the different components in the ternary mixture and calculated Keq. [298 K]
- **Table 3S:** Data on relative solubility increases vis-à-vis water and ranges of maximum solubility.
- **Table 4S:** Data on relative solubility increases vis-à-vis Cyrene and ranges of maximum solubility.
- **Figure 2S:** ESI(+) mass-spectrum of 80 wt% Cyrene in H<sub>2</sub>O.
- **Figure 3S\_A:** <sup>1</sup>H NMR spectra showing the evolution of a 65 wt% Cyrene in H<sub>2</sub>O mixture when increasing the temperature from 298K to 358K.

- **Figure 3S\_B:**  $^1\text{H}$  NMR spectra showing the evolution of a 65 wt% Cyrene in  $\text{H}_2\text{O}$  mixture when decreasing the temperature from 298K to 258K.
- **Quantum Chemical and Density Functional Theory Calculations**

### **Materials, methods and instrumentation**

Double distilled dihydrolevoglucosenone (Cyrene) was provided by the Circa company and used as is.

$^1\text{H}$  and  $^{13}\text{C}$  NMR experiments were recorded in the absence of a deuterated solvent. It was determined that a relaxation delay of 20s allowed for reliable quantification of the  $^1\text{H}$  and  $^{13}\text{C}$  NMR signals. To aid with the quantification the NMR tubes were filled to ~4 cm height in an as consistent manner as possible. Composition of the TM- $\text{H}_2\text{O}$  mixture was determined from  $^1\text{H}$  NMR data while the solubility data was recorded from  $^{13}\text{C}$  NMR data as to avoid the higher complexity of the  $^1\text{H}$  NMR data.

All Cyrene- $\text{H}_2\text{O}$  mixtures were prepared to a total volume of 2 mL and stirred at 400 rpm for 30 minutes. This allows in all cases to obtain a homogeneous solution. Inhomogeneity of the Cyrene/water mixtures is commonly observed for samples rich in Cyrene but disappearing through continued stirring (30 min is ample) or gentle heating (e.g. in the hand). To determine the solubility, saturated solutions were prepared and stirred for 35 minutes at 400 rpm. This is followed by room temperature centrifugation at 3500 rpm. The supernatant was pipetted out, filtered over cotton if still cloudy, and added into an NMR tube to a liquid height of 4 cm.

The NMR spectra at the University of Wisconsin-Madison were taken using an Avance-400. No D spectra were taken by turning off the lock and shimming on  $^1\text{H}$  using the topshim option 1h lockoff o1p=<value in ppm> selwid=0.5. A preliminary  $^1\text{H}$  NMR spectrum without shimming is used to determine the chemical shift of a peak used in the shimming routine.

The NMR spectra at the University of York were taken on a Bruker AVIIIHD 500 MHz. The instrument runs Topspin 3.5. and uses a TBO triple resonance probe for HFX.

An exemplary calculation of maximal solubility for the particular case of aspirin is shown below in illustrative  $^{13}\text{C}$  and  $^1\text{H}$  NMR spectra

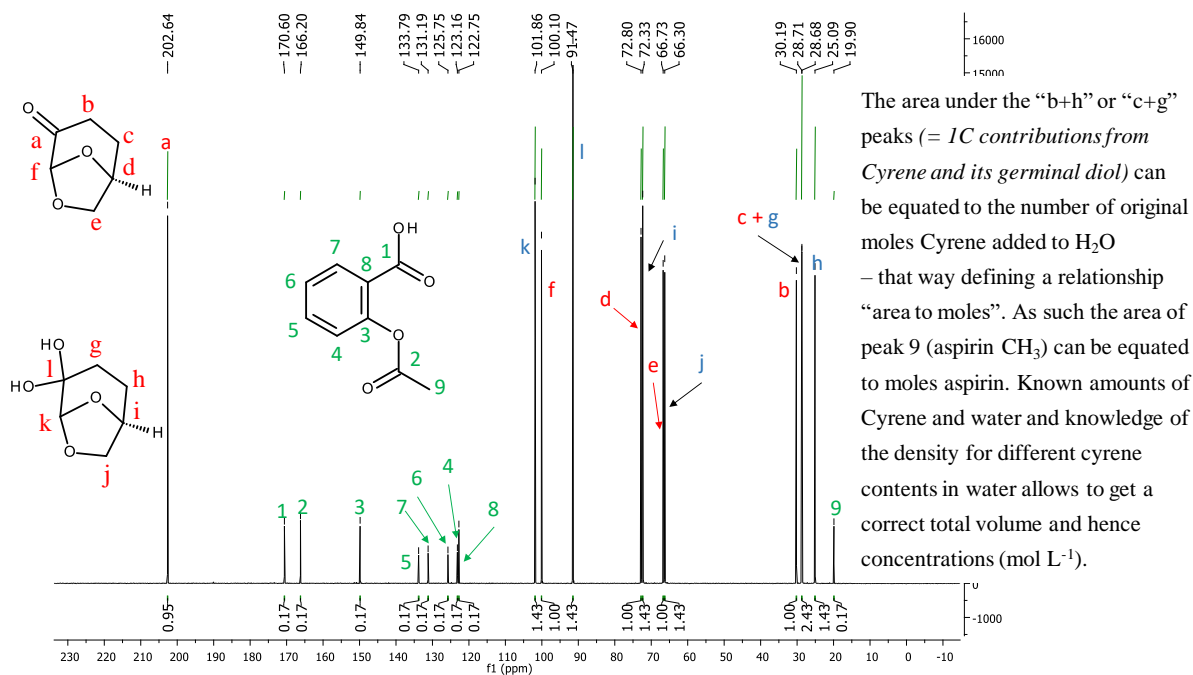

**Figure 1S\_A:**  $^{13}\text{C}$  NMR spectrum (with annotations) of the maximal dissolution of aspirin in a Cyrene/ Cyrene gem diol / $\text{H}_2\text{O}$  mixture made by adding Cyrene in 70 wt% to  $\text{H}_2\text{O}$ .

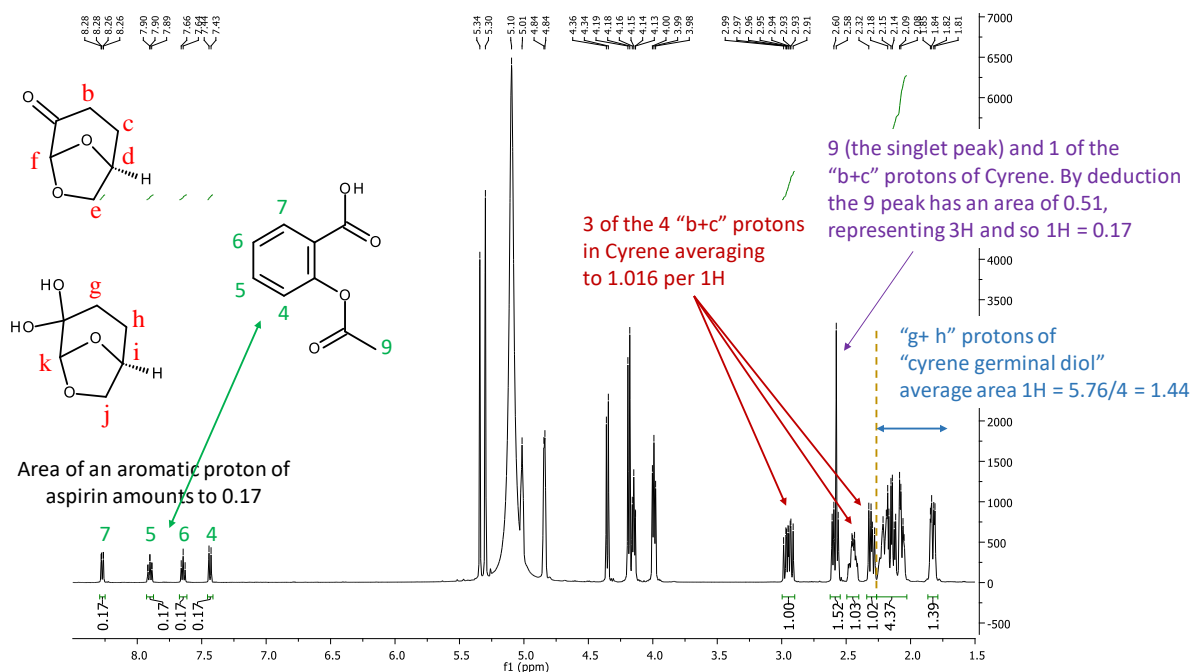

**Figure 1S\_B:**  $^1\text{H}$  NMR spectrum (with annotations) of the maximal dissolution of aspirin in a Cyrene/ Cyrene gem diol / $\text{H}_2\text{O}$  mixture made by adding Cyrene in 70 wt% to  $\text{H}_2\text{O}$ .

**Table 1S\_A:** Solubilities of aspirin, salicylic acid, ferulic acid and phthalic acid as a function of the wt% of Cyrene in H<sub>2</sub>O. [293 K]

| wt%<br>Cyrene | Salicylic<br>acid<br>(mol L <sup>-1</sup> ) | wt%<br>Cyrene | Aspirin<br>(mol L <sup>-1</sup> ) | wt%<br>Cyrene | Ferulic<br>acid<br>(mol L <sup>-1</sup> ) | wt%<br>Cyrene | Phthalic<br>acid<br>(mol L <sup>-1</sup> ) | wt%<br>Cyrene | Ibuprofen<br>(mol L <sup>-1</sup> ) |
|---------------|---------------------------------------------|---------------|-----------------------------------|---------------|-------------------------------------------|---------------|--------------------------------------------|---------------|-------------------------------------|
| 100.0         | 0.68                                        | 100.0         | 0.29                              | 100.0         | 0.20                                      | 100.0         | 0.05                                       | 100.0         | 0.68                                |
| 97.2          | 1.09                                        | 97.5          | 0.72                              | <b>94.9</b>   | <b>0.50</b>                               | 95.1          | 0.21                                       | <b>97.1</b>   | <b>0.99</b>                         |
| 94.6          | 1.35                                        | <b>95.0</b>   | <b>0.93</b>                       | <b>90.1</b>   | <b>0.58</b>                               | 90.0          | 0.35                                       | <b>95.0</b>   | <b>1.02</b>                         |
| 92.4          | 1.49                                        | <b>89.7</b>   | <b>0.92</b>                       | <b>85.0</b>   | <b>0.59</b>                               | <b>84.9</b>   | <b>0.41</b>                                | <b>92.5</b>   | <b>1.02</b>                         |
| <b>89.4</b>   | <b>1.65</b>                                 | 84.6          | 0.88                              | 80.2          | 0.52                                      | <b>79.8</b>   | <b>0.44</b>                                | 89.9          | 0.93                                |
| 84.8          | 1.55                                        | 80.1          | 0.77                              | 75.3          | 0.44                                      | <b>75.3</b>   | <b>0.42</b>                                | 85.1          | 0.72                                |
| 79.5          | 1.49                                        | 74.6          | 0.66                              | 70.0          | 0.39                                      | 70.2          | 0.41                                       | 80.2          | 0.54                                |
| 77.5          | 1.22                                        | 70.2          | 0.48                              | 64.9          | 0.26                                      | 65.4          | 0.35                                       | 75.2          | 0.30                                |
| 74.8          | 1.06                                        | 64.8          | 0.34                              | 59.8          | 0.16                                      | 60.2          | 0.27                                       | 70.1          | 0.14                                |
| 70.4          | 0.98                                        | 60.1          | 0.26                              | 55.0          | 0.11                                      | 55.0          | 0.22                                       | 64.9          | 0.05                                |
| 64.9          | 0.52                                        | 54.8          | 0.15                              | 49.9          | 0.06                                      | 50.0          | 0.16                                       |               |                                     |
| 59.9          | 0.32                                        | 49.9          | 0.11                              |               |                                           |               |                                            |               |                                     |
| 50.2          | 0.12                                        | 45.2          | 0.07                              |               |                                           |               |                                            |               |                                     |
| 39.8          | 0.05                                        | 29.9          | 0.04                              |               |                                           |               |                                            |               |                                     |
| 19.9          | 0.01                                        | 25.2          | 0.03                              |               |                                           |               |                                            |               |                                     |
| 10.3          | 0.01                                        | 9.9           | 0.02                              |               |                                           |               |                                            |               |                                     |
|               |                                             | 8.9           | 0.02                              |               |                                           |               |                                            |               |                                     |

**Table 1S\_B:** Experimental solubilities of mandelic acid and caffeine as a function of the wt% of Cyrene in H<sub>2</sub>O. [293 K]

| wt%<br>Cyrene | Mandelic<br>acid<br>(mol L <sup>-1</sup> ) | wt%<br>Cyrene | Caffeine<br>(mol L <sup>-1</sup> ) |
|---------------|--------------------------------------------|---------------|------------------------------------|
| 100.0         | 1.66                                       | 100.0         | 0.10                               |
| 95.0          | 3.40                                       | 94.9          | 0.25                               |
| 89.9          | 4.37                                       | 89.9          | 0.42                               |
| <b>85.0</b>   | <b>4.92</b>                                | 85.0          | 0.46                               |
| <b>80.1</b>   | <b>4.71</b>                                | <b>80.2</b>   | <b>0.52</b>                        |
| <b>75.1</b>   | <b>4.73</b>                                | <b>75.1</b>   | <b>0.51</b>                        |
| 70.1          | 4.67                                       | <b>70.0</b>   | <b>0.52</b>                        |
| 64.9          | 4.59                                       | 65.1          | 0.47                               |
| 63.3          | 5.63                                       | 60.0          | 0.48                               |
| 62.4          | 5.48                                       | 54.9          | 0.41                               |
| 59.7          | 5.74                                       | 50.4          | 0.39                               |
| 55.0          | 5.35                                       | 45.2          | 0.26                               |
| 49.7          | 4.87                                       | 40.0          | 0.21                               |
| 45.1          | 4.72                                       | 30.2          | 0.17                               |
| 40.1          | 4.18                                       | 19.8          | 0.15                               |
| 34.9          | 3.55                                       | 9.9           | 0.11                               |
| 30.2          | 3.67                                       |               |                                    |
| 27.5          | 2.89                                       |               |                                    |
| 25.7          | 2.70                                       |               |                                    |
| 22.6          | 2.44                                       |               |                                    |
| 19.9          | 2.58                                       |               |                                    |
| 17.6          | 1.92                                       |               |                                    |
| 14.7          | 1.63                                       |               |                                    |
| 10.6          | 1.50                                       |               |                                    |
| 5.2           | 1.21                                       |               |                                    |

**Table 2S\_A:** Composition of the Cyrene/gem diol/water ternary mixture (mol geminal diol and mol H<sub>2</sub>O both normalized to 1 mol Cyrene). [298 K]

| <b>wt% Cyrene in H<sub>2</sub>O</b> | <b>mol geminal diol/ mol Cyrene</b> | <b>mol H<sub>2</sub>O/ mol Cyrene</b> |
|-------------------------------------|-------------------------------------|---------------------------------------|
| 5.2                                 | 6.4                                 | 955.1                                 |
| 10.1                                | 8.6                                 | 600.6                                 |
| 15.0                                | 10.2                                | 442.9                                 |
| 20.0                                | 10.7                                | 322.4                                 |
| 25.0                                | 10.5                                | 235.5                                 |
| 30.2                                | 10.0                                | 171.4                                 |
| 35.1                                | 9.2                                 | 125.3                                 |
| 39.4                                | 8.3                                 | 93.2                                  |
| 45.0                                | 7.1                                 | 63.1                                  |
| 50.3                                | 5.6                                 | 41.0                                  |
| 53.8                                | 4.7                                 | 30.0                                  |
| 60.1                                | 3.3                                 | 16.9                                  |
| 65.0                                | 2.3                                 | 10.4                                  |
| 70.3                                | 1.6                                 | 6.1                                   |
| 75.5                                | 1.0                                 | 3.7                                   |
| 80.1                                | 0.7                                 | 2.3                                   |
| 84.8                                | 0.5                                 | 1.4                                   |
| 89.9                                | 0.3                                 | 0.7                                   |
| 95.1                                | 0.1                                 | 0.3                                   |
| 100.0                               | 0.0                                 | 0.0                                   |

**Table 2S\_B:** Concentration data of the different components in the ternary mixture and calculated  $K_{eq}$ . [298 K]

| <b>wt% Cyrene<br/>in H<sub>2</sub>O</b> | <b>M Cyrene<br/>(mol L<sup>-1</sup>)</b> | <b>M gem diol<br/>(mol L<sup>-1</sup>)</b> | <b>M H<sub>2</sub>O<br/>(mol L<sup>-1</sup>)</b> | <b>K<sub>eq</sub> (basic)</b> | <b>K<sub>eq</sub> (advanced)</b> |
|-----------------------------------------|------------------------------------------|--------------------------------------------|--------------------------------------------------|-------------------------------|----------------------------------|
| 5.2                                     | 0.02                                     | 0.39                                       | 53.01                                            | 0.43                          | 0.008                            |
| 10.1                                    | 0.03                                     | 0.78                                       | 50.73                                            | 0.45                          | 0.009                            |
| 15.0                                    | 0.06                                     | 1.17                                       | 48.44                                            | 0.41                          | 0.009                            |
| 20.0                                    | 0.09                                     | 1.58                                       | 46.01                                            | 0.38                          | 0.009                            |
| 25.0                                    | 0.12                                     | 2.01                                       | 43.50                                            | 0.38                          | 0.010                            |
| 30.2                                    | 0.18                                     | 2.45                                       | 40.79                                            | 0.34                          | 0.009                            |
| 35.1                                    | 0.23                                     | 2.89                                       | 38.05                                            | 0.33                          | 0.010                            |
| 39.5                                    | 0.30                                     | 3.26                                       | 35.57                                            | 0.30                          | 0.010                            |
| 45.0                                    | 0.42                                     | 3.72                                       | 32.27                                            | 0.28                          | 0.011                            |
| 50.3                                    | 0.61                                     | 4.10                                       | 28.99                                            | 0.23                          | 0.011                            |
| 53.8                                    | 0.80                                     | 4.28                                       | 26.79                                            | 0.20                          | 0.011                            |
| 60.1                                    | 1.26                                     | 4.51                                       | 22.79                                            | 0.16                          | 0.011                            |
| 65.0                                    | 1.87                                     | 4.45                                       | 19.77                                            | 0.12                          | 0.010                            |
| 70.3                                    | 2.64                                     | 4.26                                       | 16.47                                            | 0.10                          | 0.011                            |
| 75.5                                    | 3.62                                     | 3.84                                       | 13.40                                            | 0.08                          | 0.012                            |
| 80.1                                    | 4.59                                     | 3.35                                       | 10.65                                            | 0.07                          | 0.014                            |
| 84.9                                    | 5.69                                     | 2.73                                       | 7.96                                             | 0.06                          | 0.018                            |
| 89.9                                    | 7.00                                     | 1.89                                       | 5.21                                             | 0.05                          | 0.024                            |
| 95.1                                    | 8.35                                     | 1.00                                       | 2.44                                             | 0.05                          | 0.058                            |

**Table 3S:** Data on relative solubility increases vis-à-vis water and ranges of maximum solubility.

| Compound                        | MW      | Solubility in water g L <sup>-1</sup> / (mol L <sup>-1</sup> ) | Maximum attainable solubility in TM-H <sub>2</sub> O (mol L <sup>-1</sup> ) | wt% Cyrene in H <sub>2</sub> O range at which maximum dissolution is observed | Maximal increase in solubility vis-à-vis solubility in water (factor) | Log Kow |
|---------------------------------|---------|----------------------------------------------------------------|-----------------------------------------------------------------------------|-------------------------------------------------------------------------------|-----------------------------------------------------------------------|---------|
| Aspirin (acetyl-salicylic acid) | 180.159 | 4.6 (0.026)                                                    | 0.93                                                                        | 89.7-95.0                                                                     | 36                                                                    | 1.19    |
| Salicylic acid                  | 138.122 | 2.24 (0.016)                                                   | 1.65                                                                        | 89.4                                                                          | 102                                                                   | 2.26    |
| Phthalic acid                   | 166.132 | 6.25 (0.038)                                                   | 0.41-0.44                                                                   | 75.2-84.9                                                                     | 11.6                                                                  | 0.73    |
| Ferulic acid                    | 194.186 | 5.97 (0.031)                                                   | 0.50-0.59                                                                   | 85.0-94.9                                                                     | 19.0                                                                  | 1.51    |
| Ibuprofen                       | 206.285 | 0.021 (1.02 E-04)                                              | 0.99-1.02                                                                   | 92.5-97.1                                                                     | 10047                                                                 | 3.97    |
| Caffeine                        | 194.194 | 21.6 (0.11)                                                    | 0.51-0.52                                                                   | 70.0-80.2                                                                     | 4.67                                                                  | -0.07   |
| Mandelic acid                   | 152.149 | 181 (1.19)                                                     | 5.74                                                                        | 59.7                                                                          | 4.13                                                                  | 0.62    |



**Table 4S:** Data on relative solubility increases vis-à-vis Cyrene and ranges of maximum solubility.

| Compound                        | MW      | Solubility in Cyrene (mol L <sup>-1</sup> ) | Maximum attainable solubility in TM-H <sub>2</sub> O (mol L <sup>-1</sup> ) | wt% Cyrene in H <sub>2</sub> O range at which maximum dissolution is observed | Maximal increase in solubility vis-à-vis solubility in Cyrene (factor) | Log Kow |
|---------------------------------|---------|---------------------------------------------|-----------------------------------------------------------------------------|-------------------------------------------------------------------------------|------------------------------------------------------------------------|---------|
| Aspirin (acetyl-salicylic acid) | 180.159 | 0.29                                        | 0.93                                                                        | 89.7-95.0                                                                     | 3.15                                                                   | 1.19    |
| Salicylic acid                  | 138.122 | 0.68                                        | 1.65                                                                        | 89.4                                                                          | 2.41                                                                   | 2.26    |
| Phthalic acid                   | 166.132 | 0.049                                       | 0.41-0.44                                                                   | 75.2-84.9                                                                     | 8.94                                                                   | 0.73    |
| Ferulic acid                    | 194.186 | 0.20                                        | 0.50-0.59                                                                   | 85.0-94.9                                                                     | 2.99                                                                   | 1.51    |
| Ibuprofen                       | 206.285 | 0.69                                        | 0.99-1.02                                                                   | 92.5-97.1                                                                     | 1.49                                                                   | 3.97    |
| Caffeine                        | 194.194 | 0.097                                       | 0.51-0.52                                                                   | 70.0-80.2                                                                     | 5.33                                                                   | -0.07   |
| Mandelic acid                   | 152.149 | 1.66                                        | 4.71-4.92                                                                   | 75.07-85.03                                                                   | 2.96                                                                   | 0.62    |

**Figure 2S:** ESI(+) mass-spectrum of 80 wt% Cyrene in H<sub>2</sub>O.

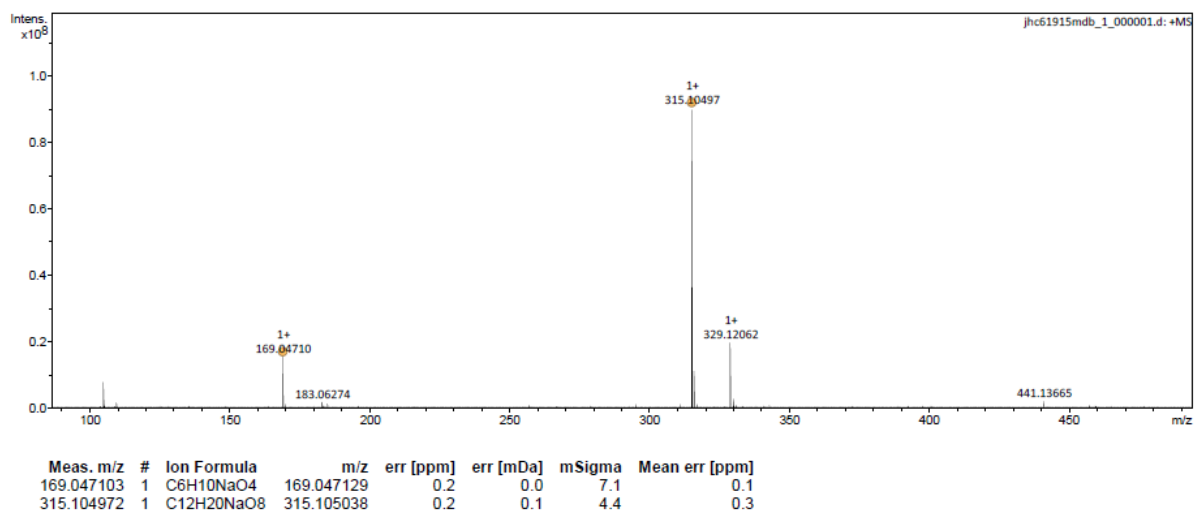

- C<sub>6</sub>H<sub>10</sub>NaO<sub>4</sub> is the sodium adduct of monomeric geminal diol
- C<sub>12</sub>H<sub>20</sub>NaO<sub>8</sub> is the sodium adduct of dimeric geminal diol

**Figure 3S\_A:**  $^1\text{H}$  NMR spectra showing the evolution of a 65 wt% Cyrene in  $\text{H}_2\text{O}$  mixture when increasing the temperature from 298K to 358K.

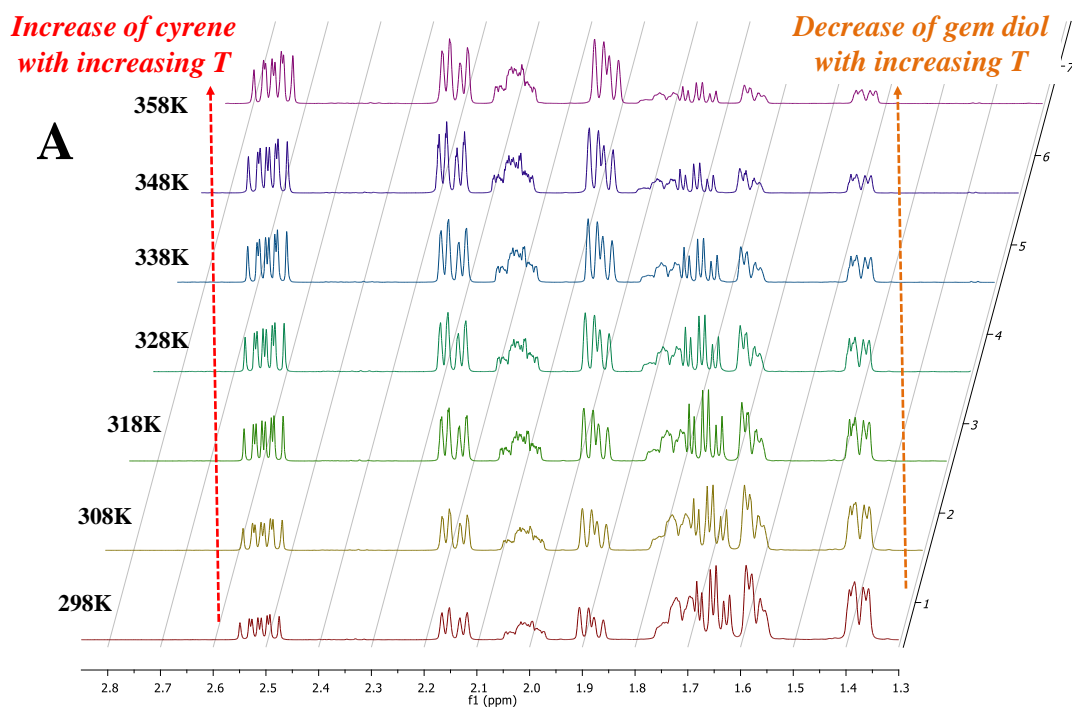

**Figure 3S\_B:**  $^1\text{H}$  NMR spectra showing the evolution of a 65 wt% Cyrene in  $\text{H}_2\text{O}$  mixture when decreasing the temperature from 298K to 258K.

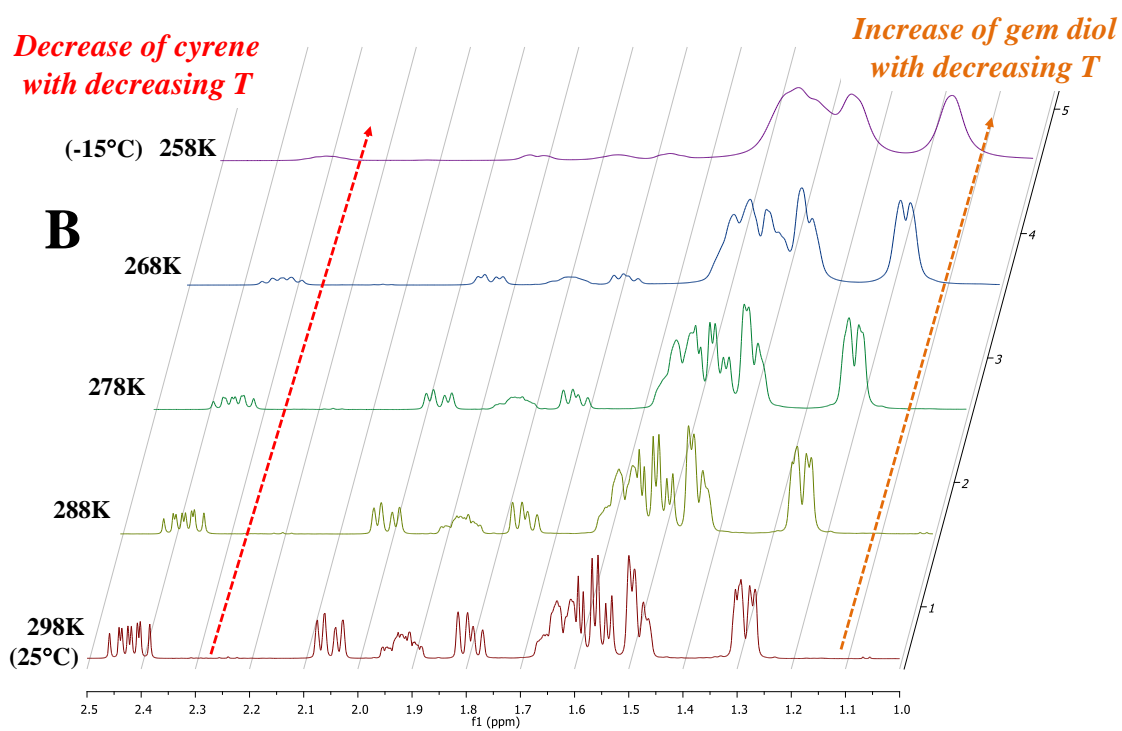

### Quantum Chemical and Density Functional Theory Calculations

A series of quantum chemical molecular orbital and density functional theory (DFT) calculations were performed using the GAUSSIAN 16<sup>1</sup> suite of programmes to find minimum energy geometries of cyrene, its geminal diol and a number of different conformers of the cyrene dimer and trimer. Geometry optimizations and vibrational frequency calculations were performed at the mp2/cc-pVDZ level for Cyrene and at the M062x/cc-pVDZ level of theory for its geminal diol as well as for the (Cyrene)<sub>2</sub> and (Cyrene)<sub>3</sub> van der Waals dimers and trimer.

Vibrational frequency calculations allowed for the characterization of stationary points, as well as determination of thermal corrections to the electronic energy, enthalpy and Gibbs free energy at 298.15 K. The frequency calculations were also used to simulate infrared spectra of each species to aid comparison with the experimental FTIR spectra.

Cyrene (mp2/ccpVDZ)

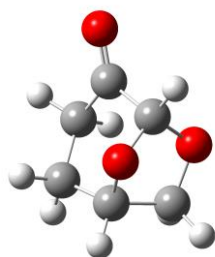

|   |          |          |          |
|---|----------|----------|----------|
| C | 1.34803  | -0.09717 | -0.06354 |
| O | 2.5245   | -0.36599 | 0.07548  |
| C | 0.2338   | -1.06879 | 0.31218  |
| C | 0.82194  | 1.21168  | -0.61004 |
| C | -0.41957 | 1.67528  | 0.16807  |
| C | -1.31501 | 0.49362  | 0.50346  |
| O | -0.56934 | -0.44894 | 1.29178  |
| C | -1.67911 | -0.35336 | -0.71422 |
| O | -0.59472 | -1.28629 | -0.81902 |
| H | 0.62421  | -2.01034 | 0.68846  |
| H | -2.18042 | 0.79236  | 1.08899  |
| H | 1.62019  | 1.9497   | -0.59664 |
| H | -0.97647 | 2.41854  | -0.40424 |
| H | -1.74725 | 0.23209  | -1.63076 |
| H | -2.60629 | -0.90312 | -0.56041 |
| H | 0.55634  | 1.02458  | -1.65325 |
| H | -0.11433 | 2.13842  | 1.1064   |

|                                       |             |
|---------------------------------------|-------------|
| Electronic Energy (EE) =              | -458.123930 |
| Zero-point Energy Correction =        | 0.140120    |
| Thermal Correction to Energy =        | 0.147052    |
| Thermal Correction to Enthalpy =      | 0.147997    |
| Thermal Correction to Free Energy =   | 0.108676    |
| EE + Zero-point Energy =              | -458.130862 |
| EE + Thermal Energy Correction =      | -458.123930 |
| EE + Thermal Enthalpy Correction =    | -458.122986 |
| EE + Thermal Free Energy Correction = | -458.162307 |

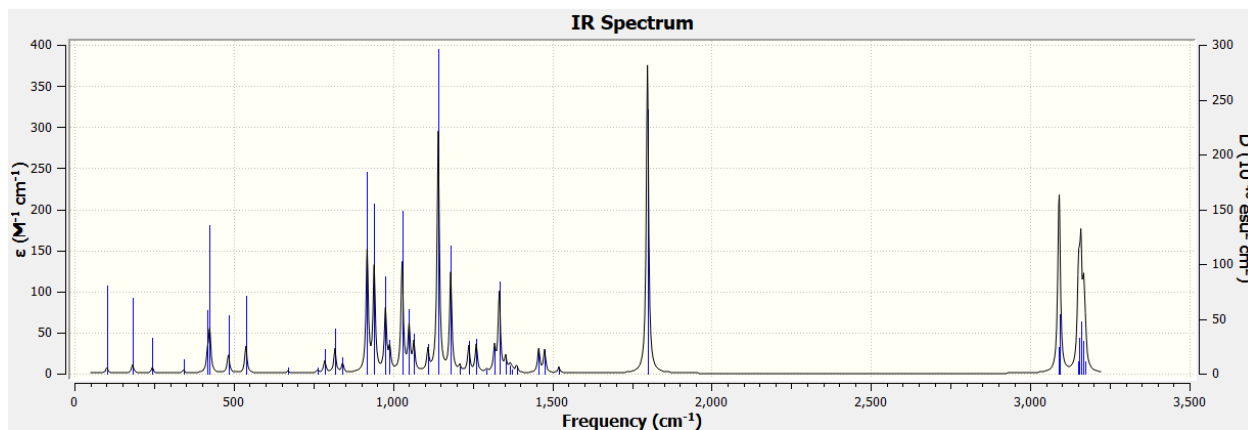



Geminal diol (m062x/cc-pVDZ)

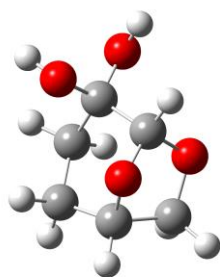

|   |          |          |          |
|---|----------|----------|----------|
| C | 1.13349  | -0.0324  | -0.04468 |
| O | 1.81118  | 0.62094  | 0.99709  |
| C | 0.02536  | -0.84963 | 0.64592  |
| C | 0.49036  | 0.93254  | -1.03876 |
| C | -0.73165 | 1.61906  | -0.41646 |
| C | -1.59924 | 0.59021  | 0.30834  |
| O | -0.82738 | 0.00247  | 1.35622  |
| C | -1.90671 | -0.64781 | -0.54652 |
| O | -0.77203 | -1.48557 | -0.33332 |
| H | 0.45103  | -1.59534 | 1.33361  |
| H | -2.49037 | 1.04214  | 0.75948  |
| H | 1.24225  | 1.66596  | -1.36898 |
| H | -1.3163  | 2.14226  | -1.1881  |
| H | -2.00441 | -0.41477 | -1.61755 |
| H | -2.81353 | -1.16584 | -0.20049 |
| H | 0.20308  | 0.34245  | -1.92043 |
| H | -0.40806 | 2.36061  | 0.32875  |
| H | 2.52611  | 1.12581  | 0.5836   |
| O | 2.00452  | -0.85178 | -0.77206 |
| H | 2.41028  | -1.46356 | -0.14027 |

|                                       |             |
|---------------------------------------|-------------|
| Electronic Energy (EE) =              | -535.376536 |
| Zero-point Energy Correction =        | 0.168209    |
| Thermal Correction to Energy =        | 0.176390    |
| Thermal Correction to Enthalpy =      | 0.177335    |
| Thermal Correction to Free Energy =   | 0.135866    |
| EE + Zero-point Energy =              | -535.208327 |
| EE + Thermal Energy Correction =      | -535.200146 |
| EE + Thermal Enthalpy Correction =    | -535.199202 |
| EE + Thermal Free Energy Correction = | -535.240670 |

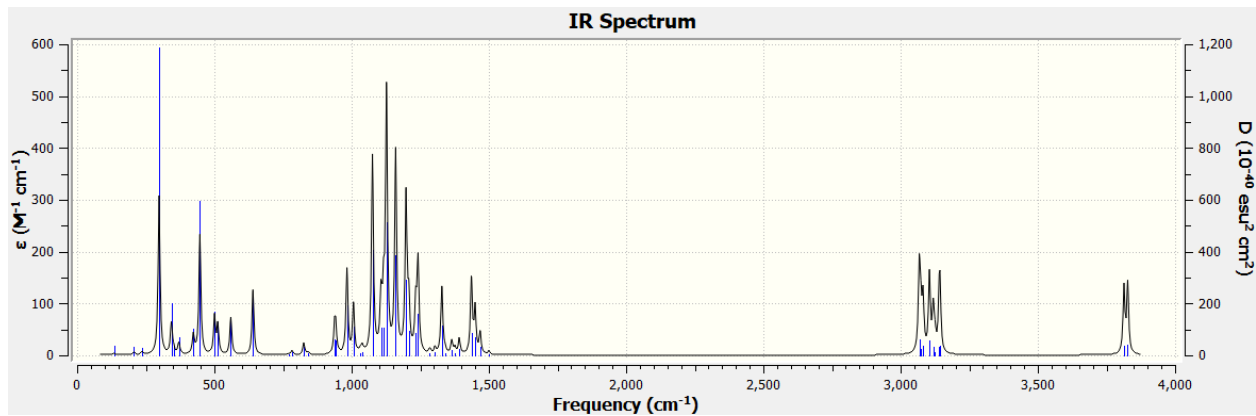

Cyrene dimer, Structure 1 (m062x/cc-pVDZ)

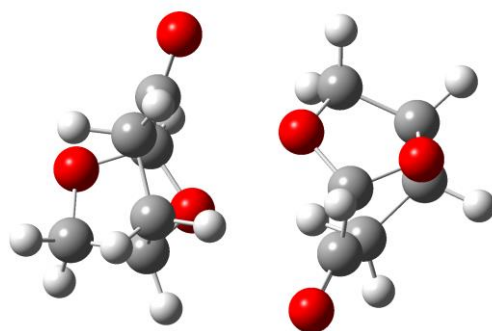

|   |          |          |          |
|---|----------|----------|----------|
| C | -1.67707 | 1.46326  | 0.06954  |
| C | -1.87887 | 0.49549  | -1.10068 |
| C | -1.90612 | -1.33967 | 0.13949  |
| C | -1.7221  | -0.64714 | 1.48652  |
| O | -1.2853  | 2.59206  | -0.09409 |
| C | -3.31208 | -1.16015 | -0.44277 |
| O | -3.23344 | 0.08917  | -1.12882 |
| C | -2.05467 | 0.85629  | 1.4062   |
| O | -1.12097 | -0.66125 | -0.85345 |
| H | -1.58854 | 0.9495   | -2.0575  |
| H | -1.56403 | -2.38061 | 0.17079  |
| H | -0.67909 | -0.79114 | 1.79378  |
| H | -2.35447 | -1.14101 | 2.24017  |
| H | -4.09027 | -1.1073  | 0.33314  |
| H | -3.56292 | -1.95507 | -1.16081 |
| H | -1.56852 | 1.43496  | 2.20081  |
| H | -3.14507 | 1.00398  | 1.49811  |
| O | 1.10397  | -2.39784 | 0.73494  |
| H | 2.21471  | -2.19913 | -1.60201 |
| C | 1.97399  | -1.216   | -1.17637 |
| H | 1.0274   | -0.89114 | -1.6396  |
| C | 1.61159  | -1.39777 | 0.2854   |
| C | 3.08079  | -0.17459 | -1.41046 |
| H | 3.00897  | 0.2439   | -2.42565 |
| H | 4.07141  | -0.64255 | -1.31395 |
| H | 1.72256  | -0.39084 | 2.22636  |
| C | 1.85687  | -0.16164 | 1.16148  |
| O | 3.14032  | 0.34257  | 0.9252   |
| C | 3.00146  | 0.93812  | -0.36954 |
| H | 3.81113  | 1.66765  | -0.48822 |
| C | 1.61196  | 1.59633  | -0.26972 |
| O | 0.95537  | 0.84894  | 0.75624  |
| H | 1.04278  | 1.5261   | -1.21019 |
| H | 1.65987  | 2.64835  | 0.04017  |

|                                  |            |
|----------------------------------|------------|
| Electronic Energy (EE) =         | -917.93336 |
| Zero-point Energy Correction =   | 0.281906   |
| Thermal Correction to Energy =   | 0.297252   |
| Thermal Correction to Enthalpy = | 0.298196   |



|                                       |            |
|---------------------------------------|------------|
| Thermal Correction to Free Energy =   | 0.238817   |
| EE + Zero-point Energy =              | -917.65145 |
| EE + Thermal Energy Correction =      | -917.63611 |
| EE + Thermal Enthalpy Correction =    | -917.63516 |
| EE + Thermal Free Energy Correction = | -917.69454 |

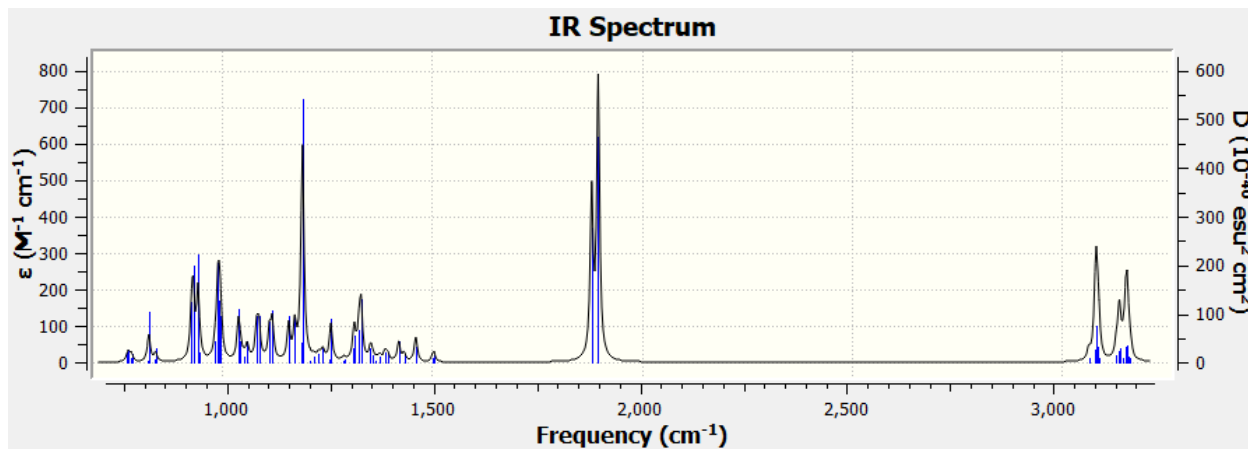

Cyrene dimer, Structure 2 (m062x/cc-pVDZ)

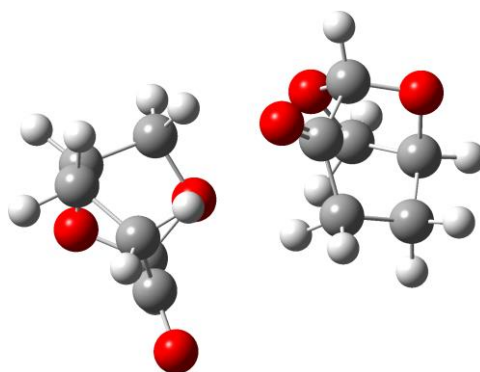

|   |          |          |          |
|---|----------|----------|----------|
| C | 2.28787  | -1.29259 | 0.3216   |
| C | 2.08417  | -0.1231  | 1.29366  |
| C | 2.69979  | 1.43823  | -0.13982 |
| C | 3.07344  | 0.50604  | -1.28903 |
| O | 2.31892  | -2.43782 | 0.69994  |
| C | 1.18449  | 1.58601  | 0.05871  |
| O | 0.86311  | 0.51915  | 0.96118  |
| C | 2.38616  | -0.86284 | -1.12985 |
| O | 3.09462  | 0.82417  | 1.09283  |
| C | -1.47325 | -0.27891 | -1.26271 |
| C | -2.41503 | 0.85765  | -0.84424 |
| C | -3.31599 | -0.26206 | 0.82815  |
| C | -2.67033 | -1.61596 | 0.55418  |
| O | -0.77858 | -0.18644 | -2.24967 |
| C | -2.34613 | 0.77586  | 1.42956  |
| O | -1.84731 | 1.47893  | 0.29034  |
| C | -1.39656 | -1.43774 | -0.28784 |
| O | -3.64475 | 0.33587  | -0.43079 |
| H | 2.07267  | -0.46253 | 2.33637  |
| H | 3.21918  | 2.40109  | -0.21034 |
| H | 4.16659  | 0.38407  | -1.27391 |
| H | 2.80023  | 0.96122  | -2.25249 |
| H | -2.54932 | 1.58498  | -1.65344 |
| H | 0.62101  | 1.46585  | -0.87705 |
| H | 0.91244  | 2.53968  | 0.53007  |
| H | 2.88722  | -1.65693 | -1.69796 |
| H | 1.34873  | -0.804   | -1.50607 |
| H | -4.24573 | -0.36094 | 1.40046  |
| H | -3.40584 | -2.22944 | 0.01399  |
| H | -2.43659 | -2.13003 | 1.4981   |
| H | -1.50667 | 0.31572  | 1.97165  |
| H | -2.86408 | 1.49253  | 2.08151  |
| H | -1.1081  | -2.34557 | -0.83409 |
| H | -0.55166 | -1.17009 | 0.36839  |

|                                  |                    |
|----------------------------------|--------------------|
| Electronic Energy (EE) =         | -917.93255 Hartree |
| Zero-point Energy Correction =   | 0.281418 Hartree   |
| Thermal Correction to Energy =   | 0.297067 Hartree   |
| Thermal Correction to Enthalpy = | 0.298011 Hartree   |

|                                       |                    |
|---------------------------------------|--------------------|
| Thermal Correction to Free Energy =   | 0.236413 Hartree   |
| EE + Zero-point Energy =              | -917.65113 Hartree |
| EE + Thermal Energy Correction =      | -917.63548 Hartree |
| EE + Thermal Enthalpy Correction =    | -917.63454 Hartree |
| EE + Thermal Free Energy Correction = | -917.69614 Hartree |

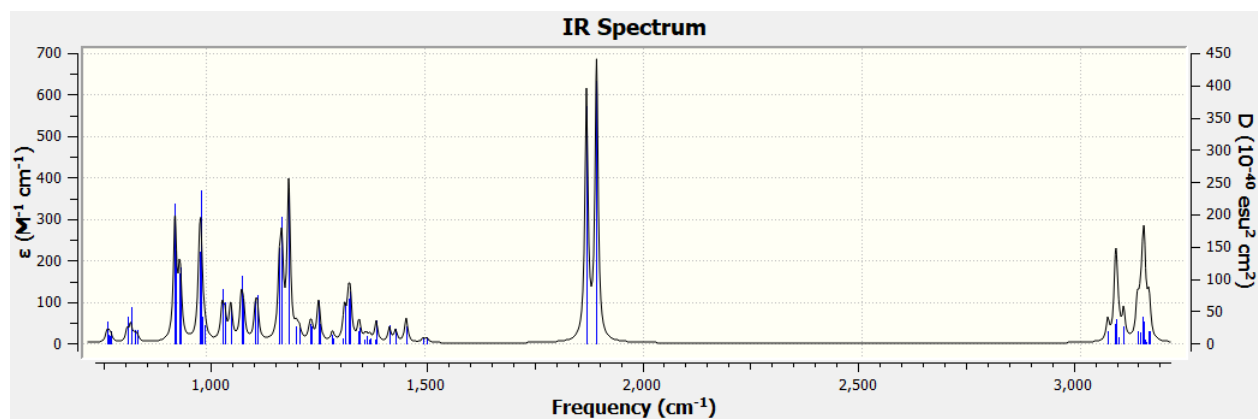

Cyrene dimer, Structure 3 (m062x/cc-pVDZ)

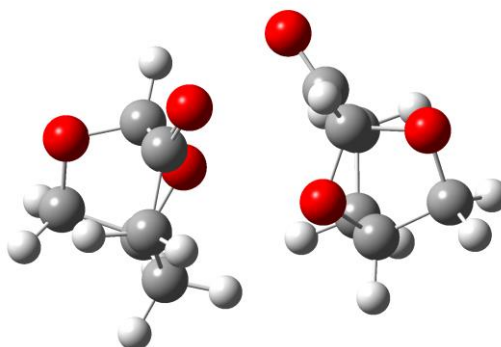

|   |          |          |          |
|---|----------|----------|----------|
| C | -1.42507 | 0.98089  | 0.95392  |
| C | -1.84872 | 0.87649  | -0.51632 |
| C | -2.0956  | -1.32728 | -0.48109 |
| C | -1.70284 | -1.53994 | 0.97775  |
| O | -0.85365 | 1.94507  | 1.39805  |
| C | -3.49102 | -0.71272 | -0.64755 |
| O | -3.25059 | 0.68865  | -0.57032 |
| C | -1.82468 | -0.23041 | 1.77752  |
| O | -1.27288 | -0.29882 | -1.04433 |
| C | 1.42534  | 0.98203  | -0.95311 |
| C | 1.84896  | 0.87614  | 0.51711  |
| C | 2.09502  | -1.32772 | 0.47974  |
| C | 1.70261  | -1.53855 | -0.97947 |
| O | 0.85325  | 1.94631  | -1.39612 |
| C | 3.49062  | -0.71391 | 0.6472   |
| O | 3.25073  | 0.68763  | 0.57114  |
| C | 1.82584  | -0.22822 | -1.77777 |
| O | 1.27262  | -0.29949 | 1.04389  |
| H | -1.53758 | 1.74991  | -1.09814 |
| H | -1.9516  | -2.23488 | -1.08164 |
| H | -0.65847 | -1.88023 | 1.00521  |
| H | -2.32757 | -2.32907 | 1.42369  |
| H | 1.53831  | 1.7492   | 1.09975  |
| H | -4.18505 | -1.01933 | 0.15007  |
| H | -3.93061 | -0.95382 | -1.62682 |
| H | -1.22119 | -0.24241 | 2.69294  |
| H | -2.87743 | -0.0602  | 2.06339  |
| H | 1.95046  | -2.23592 | 1.07923  |
| H | 0.65793  | -1.87783 | -1.00772 |
| H | 2.32689  | -2.32767 | -1.42604 |
| H | 4.1848   | -1.0201  | -0.15045 |
| H | 3.9298   | -0.95609 | 1.62639  |
| H | 1.22375  | -0.23921 | -2.69412 |
| H | 2.87908  | -0.05792 | -2.0618  |

|                                  |            |
|----------------------------------|------------|
| Electronic Energy (EE) =         | -917.93138 |
| Zero-point Energy Correction =   | 0.281254   |
| Thermal Correction to Energy =   | 0.296859   |
| Thermal Correction to Enthalpy = | 0.297803   |

|                                       |            |
|---------------------------------------|------------|
| Thermal Correction to Free Energy =   | 0.237357   |
| EE + Zero-point Energy =              | -917.65012 |
| EE + Thermal Energy Correction =      | -917.63452 |
| EE + Thermal Enthalpy Correction =    | -917.63357 |
| EE + Thermal Free Energy Correction = | -917.69402 |

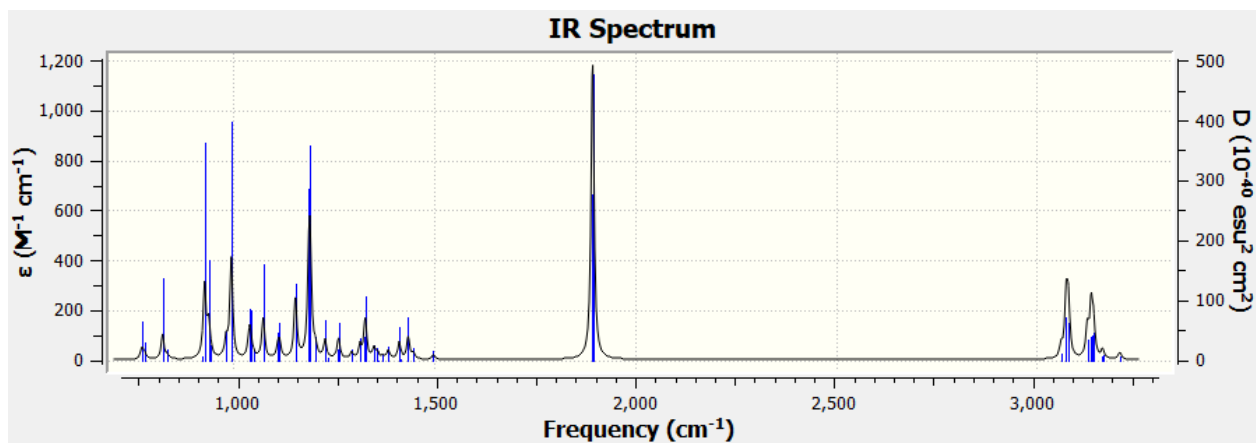

Cyrene dimer, Structure 4 (m062x/cc-pVDZ)

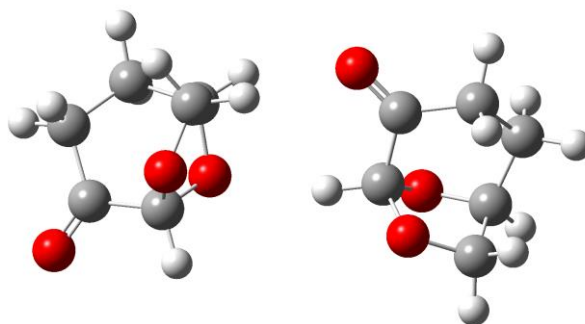

|   |          |          |          |
|---|----------|----------|----------|
| C | 2.07135  | 1.04916  | 0.19893  |
| C | 1.78707  | -0.41747 | -0.1447  |
| C | 3.86962  | -0.86287 | -0.75253 |
| C | 4.43927  | 0.53153  | -0.50134 |
| O | 1.2083   | 1.89457  | 0.24009  |
| C | 3.59468  | -1.64401 | 0.53823  |
| O | 2.2823   | -1.22705 | 0.90626  |
| C | 3.53955  | 1.31799  | 0.47143  |
| O | 2.5491   | -0.73233 | -1.28436 |
| C | -3.83128 | -0.91707 | -0.10814 |
| C | -2.43562 | -0.9075  | 0.52786  |
| C | -1.81133 | 0.99825  | -0.42068 |
| C | -3.1056  | 1.24575  | -1.19052 |
| O | -4.48434 | -1.92238 | -0.22805 |
| C | -1.93568 | 1.2533   | 1.08396  |
| O | -2.419   | 0.01017  | 1.59948  |
| C | -4.27411 | 0.46356  | -0.56094 |
| O | -1.53761 | -0.41213 | -0.43769 |
| H | 0.72101  | -0.60635 | -0.32196 |
| H | 4.46826  | -1.42334 | -1.48021 |
| H | 4.48474  | 1.05286  | -1.46882 |
| H | 5.46572  | 0.46321  | -0.11098 |
| H | -2.13209 | -1.908   | 0.85794  |
| H | 4.30446  | -1.39939 | 1.34318  |
| H | 3.5982   | -2.73031 | 0.36681  |
| H | 3.71979  | 2.39942  | 0.43851  |
| H | 3.71913  | 0.97718  | 1.50537  |
| H | -0.94803 | 1.50986  | -0.8595  |
| H | -2.94835 | 0.91094  | -2.2265  |
| H | -3.33027 | 2.32248  | -1.2195  |
| H | -2.64977 | 2.05623  | 1.32197  |
| H | -0.95655 | 1.48232  | 1.52589  |
| H | -5.13204 | 0.36073  | -1.23663 |
| H | -4.62166 | 0.9816   | 0.34919  |

|                                     |            |
|-------------------------------------|------------|
| Electronic Energy (EE) =            | -917.92708 |
| Zero-point Energy Correction =      | 0.28088    |
| Thermal Correction to Energy =      | 0.296886   |
| Thermal Correction to Enthalpy =    | 0.297831   |
| Thermal Correction to Free Energy = | 0.232485   |

|                                       |            |
|---------------------------------------|------------|
| EE + Zero-point Energy =              | -917.6462  |
| EE + Thermal Energy Correction =      | -917.6302  |
| EE + Thermal Enthalpy Correction =    | -917.62925 |
| EE + Thermal Free Energy Correction = | -917.6946  |

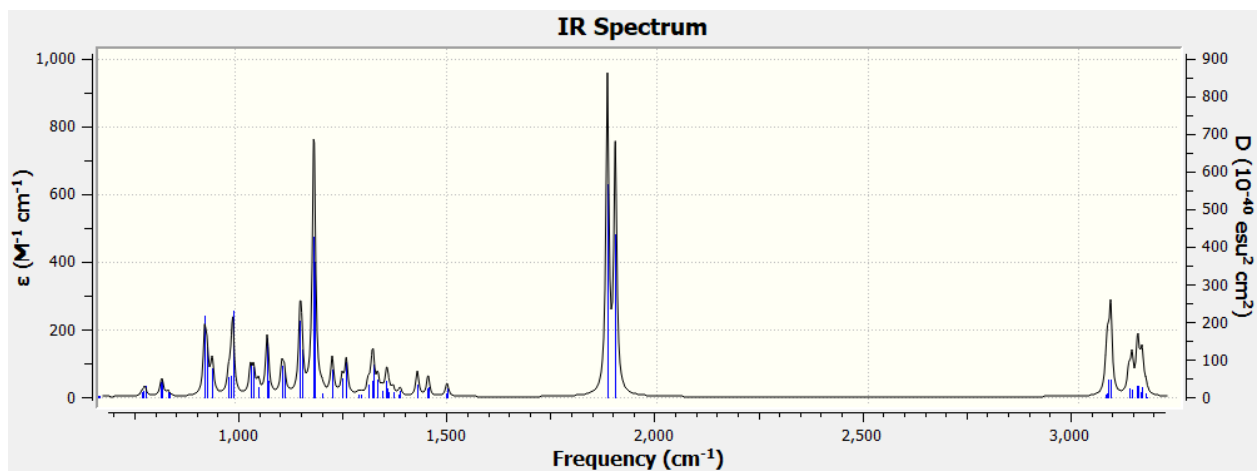

Cyrene dimer, Structure 5 (m062x/cc-pVDZ)

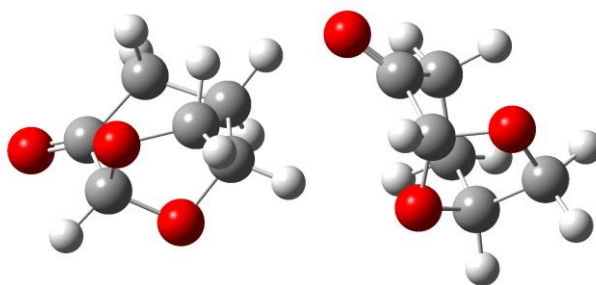

|   |          |          |          |
|---|----------|----------|----------|
| C | -3.88307 | 0.50041  | -0.15857 |
| C | -3.28133 | -0.78715 | -0.73351 |
| C | -1.18539 | -0.22755 | -0.30073 |
| C | -1.48342 | 1.13104  | 0.33163  |
| O | -4.97771 | 0.90219  | -0.46334 |
| C | -1.54135 | -1.40235 | 0.61879  |
| O | -2.91952 | -1.64486 | 0.32894  |
| C | -2.94626 | 1.19593  | 0.81358  |
| O | -2.08941 | -0.43829 | -1.39127 |
| C | 1.84507  | 0.02257  | 1.16767  |
| C | 2.58406  | -1.02697 | 0.32845  |
| C | 3.02316  | 0.36241  | -1.34016 |
| C | 2.38002  | 1.59972  | -0.71732 |
| O | 1.00155  | -0.27162 | 1.98013  |
| C | 4.36062  | -0.01155 | -0.69099 |
| O | 3.97525  | -0.81589 | 0.42361  |
| C | 2.25281  | 1.43906  | 0.81157  |
| O | 2.23192  | -0.78697 | -1.01415 |
| H | -3.97199 | -1.28439 | -1.42511 |
| H | -0.16696 | -0.29105 | -0.70258 |
| H | -1.31187 | 1.90508  | -0.43281 |
| H | -0.79661 | 1.31023  | 1.17179  |
| H | 2.31562  | -2.05    | 0.61832  |
| H | -1.41177 | -1.16132 | 1.68282  |
| H | -0.95496 | -2.30107 | 0.37609  |
| H | -3.29619 | 2.22281  | 0.97601  |
| H | -3.04381 | 0.65203  | 1.76848  |
| H | 3.07234  | 0.43132  | -2.43279 |
| H | 1.38148  | 1.72459  | -1.16372 |
| H | 2.96501  | 2.49835  | -0.96356 |
| H | 4.92317  | 0.86587  | -0.33894 |
| H | 4.99252  | -0.60506 | -1.367   |
| H | 1.54302  | 2.14972  | 1.25266  |
| H | 3.23488  | 1.60287  | 1.28662  |

|                                     |            |
|-------------------------------------|------------|
| Electronic Energy (EE) =            | -917.92667 |
| Zero-point Energy Correction =      | 0.281      |
| Thermal Correction to Energy =      | 0.296857   |
| Thermal Correction to Enthalpy =    | 0.297801   |
| Thermal Correction to Free Energy = | 0.234374   |
| EE + Zero-point Energy =            | -917.64567 |



|                                       |            |
|---------------------------------------|------------|
| EE + Thermal Energy Correction =      | -917.62981 |
| EE + Thermal Enthalpy Correction =    | -917.62887 |
| EE + Thermal Free Energy Correction = | -917.6923  |

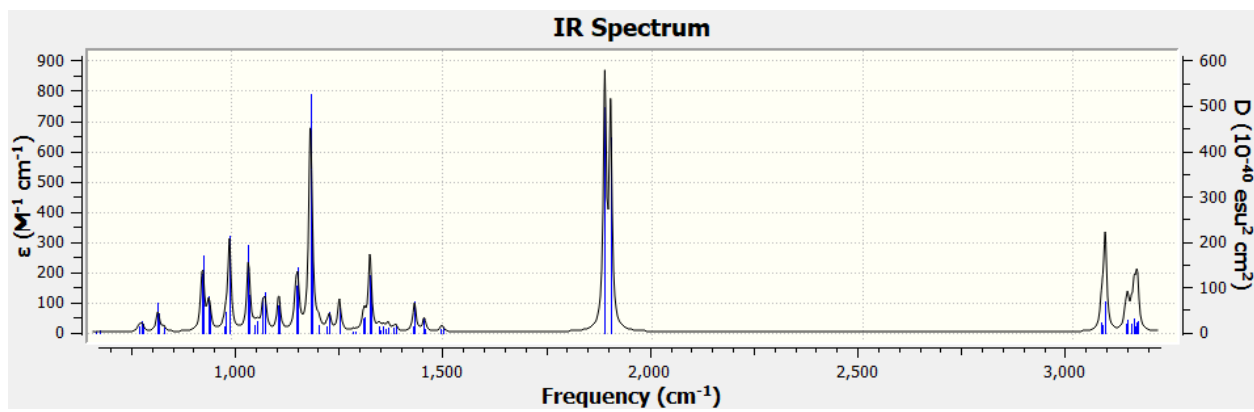

Cyrene dimer, Structure 6 (m062x/cc-pVDZ)

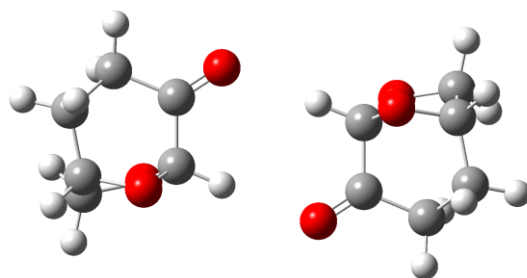

|   |          |          |          |
|---|----------|----------|----------|
| C | -1.1631  | 2.0217   | -0.09134 |
| C | -2.00632 | 0.74131  | -0.09232 |
| C | -3.84093 | 1.73869  | 0.64877  |
| C | -3.25703 | 3.14561  | 0.75937  |
| O | 0.04392  | 2.01803  | -0.06037 |
| C | -4.10876 | 1.30958  | -0.799   |
| O | -2.85995 | 0.77236  | -1.22351 |
| C | -2.00632 | 3.28396  | -0.12924 |
| O | -2.84334 | 0.79341  | 1.03815  |
| C | 1.1631   | -2.0217  | -0.09134 |
| C | 2.00632  | -0.74131 | -0.09232 |
| C | 3.84093  | -1.73869 | 0.64877  |
| C | 3.25703  | -3.14561 | 0.75937  |
| O | -0.04392 | -2.01803 | -0.06037 |
| C | 4.10876  | -1.30958 | -0.799   |
| O | 2.85995  | -0.77236 | -1.22351 |
| C | 2.00632  | -3.28396 | -0.12924 |
| O | 2.84334  | -0.79341 | 1.03815  |
| H | -1.39482 | -0.16907 | -0.08075 |
| H | -4.70581 | 1.60277  | 1.30899  |
| H | -2.98474 | 3.31181  | 1.8121   |
| H | -4.01242 | 3.89828  | 0.48732  |
| H | 1.39482  | 0.16907  | -0.08075 |
| H | -4.39362 | 2.15304  | -1.4467  |
| H | -4.88161 | 0.52896  | -0.85643 |
| H | -1.3807  | 4.14158  | 0.14671  |
| H | -2.30801 | 3.4112   | -1.18286 |
| H | 4.70581  | -1.60277 | 1.30899  |
| H | 2.98474  | -3.31181 | 1.8121   |
| H | 4.01242  | -3.89828 | 0.48732  |
| H | 4.39362  | -2.15304 | -1.4467  |
| H | 4.88161  | -0.52896 | -0.85643 |
| H | 1.3807   | -4.14158 | 0.14671  |
| H | 2.30801  | -3.4112  | -1.18286 |

|                                     |            |
|-------------------------------------|------------|
| Electronic Energy (EE) =            | -917.92488 |
| Zero-point Energy Correction =      | 0.28102    |
| Thermal Correction to Energy =      | 0.296958   |
| Thermal Correction to Enthalpy =    | 0.297902   |
| Thermal Correction to Free Energy = | 0.234493   |
| EE + Zero-point Energy =            | -917.64386 |

|                                       |            |
|---------------------------------------|------------|
| EE + Thermal Energy Correction =      | -917.62792 |
| EE + Thermal Enthalpy Correction =    | -917.62698 |
| EE + Thermal Free Energy Correction = | -917.69039 |

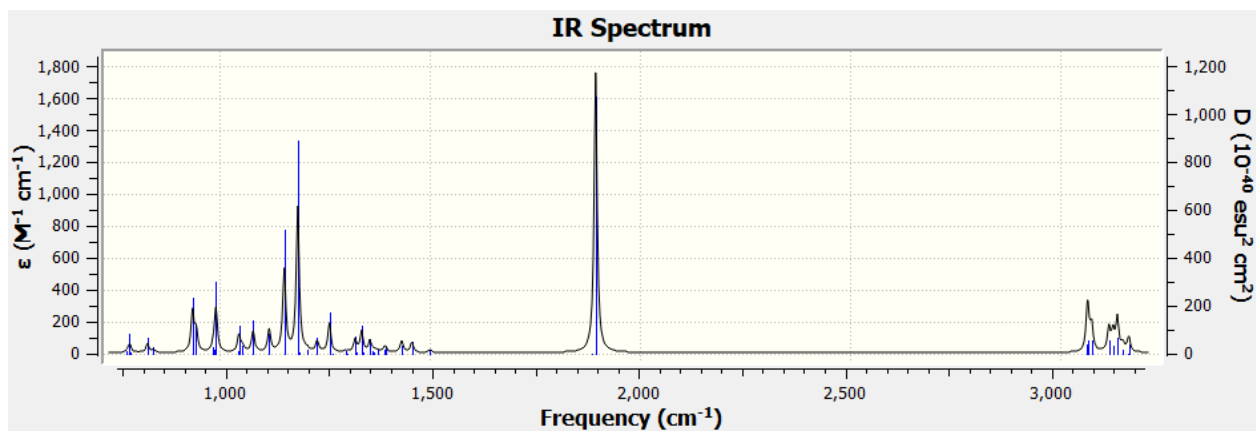

Cyrene trimer (m062x/cc-pVDZ)

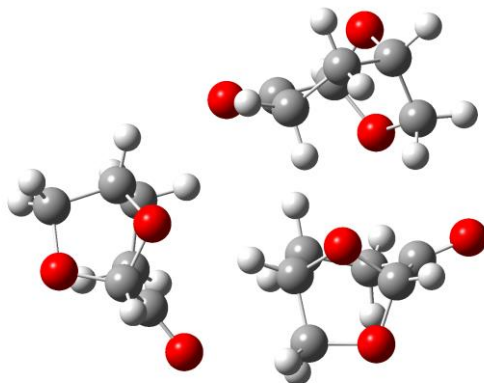

|   |          |          |          |
|---|----------|----------|----------|
| C | 2.51587  | 2.22208  | 0.58535  |
| C | 2.01208  | 2.511    | -0.83355 |
| C | -0.01057 | 1.66983  | -0.49363 |
| C | 0.18853  | 1.30086  | 0.97352  |
| O | 3.69106  | 2.13627  | 0.84322  |
| C | -0.17678 | 3.1748   | -0.71293 |
| O | 1.17174  | 3.64235  | -0.82347 |
| C | 1.38848  | 2.05268  | 1.58451  |
| O | 1.20754  | 1.41871  | -1.21584 |
| C | -3.26566 | 1.10742  | 0.2159   |
| C | -3.33998 | 0.18511  | -1.0082  |
| C | -2.95983 | -1.66706 | 0.15104  |
| C | -2.88493 | -1.0016  | 1.52169  |
| O | -2.92984 | 2.26568  | 0.13379  |
| C | -4.38451 | -1.75411 | -0.40236 |
| O | -4.57818 | -0.48609 | -1.03327 |
| C | -3.57443 | 0.37883  | 1.5067   |
| O | -2.34814 | -0.79819 | -0.81888 |
| H | 2.84265  | 2.64281  | -1.53909 |
| H | -0.7901  | 1.06025  | -0.95934 |
| H | 0.37121  | 0.21957  | 1.03362  |
| H | -0.73232 | 1.52617  | 1.53269  |
| H | -3.16697 | 0.73156  | -1.94449 |
| H | -0.6816  | 3.66842  | 0.12823  |
| H | -0.72007 | 3.39753  | -1.64208 |
| H | 1.78465  | 1.55362  | 2.47671  |
| H | 1.08263  | 3.0747   | 1.86736  |
| H | -2.40626 | -2.61033 | 0.13992  |
| H | -1.82041 | -0.89694 | 1.77515  |
| H | -3.34026 | -1.65268 | 2.28268  |
| H | -5.1399  | -1.89342 | 0.38513  |
| H | -4.48685 | -2.55125 | -1.15272 |
| H | -3.28546 | 1.00789  | 2.35813  |
| H | -4.66992 | 0.25128  | 1.53413  |
| O | -0.16595 | -2.58431 | 0.97347  |
| H | 0.01197  | -2.37687 | -1.60665 |
| C | 0.90557  | -1.97734 | -1.11121 |
| H | 0.87631  | -0.87726 | -1.20541 |

|   |         |          |          |
|---|---------|----------|----------|
| C | 0.83465 | -2.2631  | 0.37259  |
| C | 2.22378 | -2.49641 | -1.71851 |
| H | 2.41925 | -2.00314 | -2.68203 |
| H | 2.15531 | -3.57876 | -1.90302 |
| H | 2.10724 | -2.29553 | 2.15617  |
| C | 2.18177 | -2.08218 | 1.08303  |
| O | 3.10827 | -2.93949 | 0.4727   |
| C | 3.38768 | -2.26117 | -0.75803 |
| H | 4.32954 | -2.66218 | -1.14999 |
| C | 3.49923 | -0.80567 | -0.28653 |
| O | 2.63822 | -0.76365 | 0.85733  |
| H | 3.13862 | -0.0913  | -1.03984 |
| H | 4.51733 | -0.53828 | 0.02615  |

|                                       |              |
|---------------------------------------|--------------|
| Electronic Energy (EE) =              | -1376.907583 |
| Zero-point Energy Correction =        | 0.422268     |
| Thermal Correction to Energy =        | 0.446756     |
| Thermal Correction to Enthalpy =      | 0.447701     |
| Thermal Correction to Free Energy =   | 0.364489     |
| EE + Zero-point Energy =              | -1376.485315 |
| EE + Thermal Energy Correction =      | -1376.460827 |
| EE + Thermal Enthalpy Correction =    | -1376.459882 |
| EE + Thermal Free Energy Correction = | -1376.543094 |

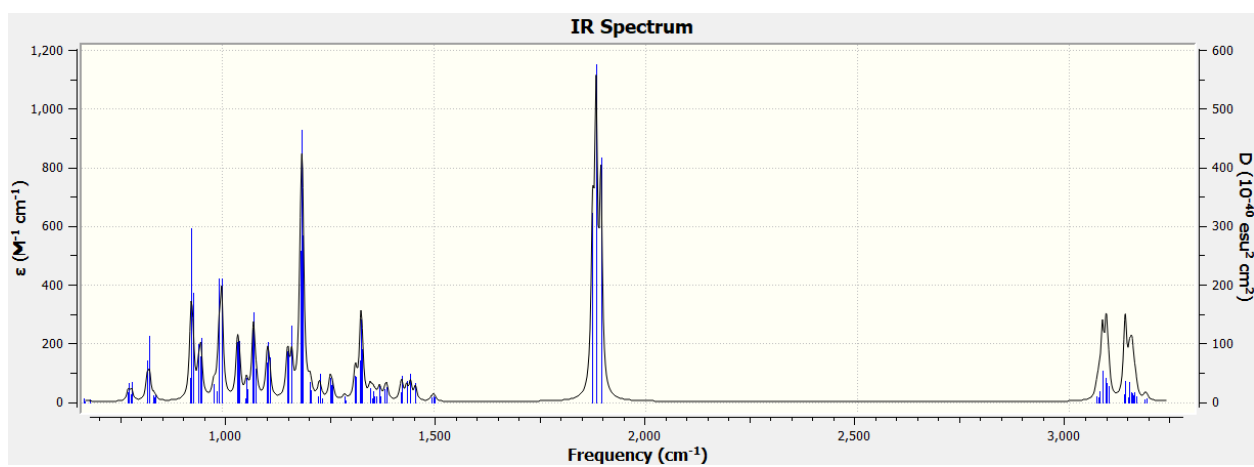

---

i Gaussian 16, Revision A.03,  
M. J. Frisch, G. W. Trucks, H. B. Schlegel, G. E. Scuseria,  
M. A. Robb, J. R. Cheeseman, G. Scalmani, V. Barone,  
G. A. Petersson, H. Nakatsuji, X. Li, M. Caricato, A. V. Marenich,  
J. Bloino, B. G. Janesko, R. Gomperts, B. Mennucci, H. P. Hratchian,  
J. V. Ortiz, A. F. Izmaylov, J. L. Sonnenberg, D. Williams-Young,  
F. Ding, F. Lipparini, F. Egidi, J. Goings, B. Peng, A. Petrone,  
T. Henderson, D. Ranasinghe, V. G. Zakrzewski, J. Gao, N. Rega,  
G. Zheng, W. Liang, M. Hada, M. Ehara, K. Toyota, R. Fukuda,  
J. Hasegawa, M. Ishida, T. Nakajima, Y. Honda, O. Kitao, H. Nakai,  
T. Vreven, K. Throssell, J. A. Montgomery, Jr., J. E. Peralta,  
F. Ogliaro, M. J. Bearpark, J. J. Heyd, E. N. Brothers, K. N. Kudin,  
V. N. Staroverov, T. A. Keith, R. Kobayashi, J. Normand,  
K. Raghavachari, A. P. Rendell, J. C. Burant, S. S. Iyengar,  
J. Tomasi, M. Cossi, J. M. Millam, M. Klene, C. Adamo, R. Cammi,  
J. W. Ochterski, R. L. Martin, K. Morokuma, O. Farkas,  
J. B. Foresman, and D. J. Fox, Gaussian, Inc., Wallingford CT, 2016.
